# Supplementary material for: Wrist-Based Photoplethysmography Assessment of Heart Rate and Heart Rate Variability: Validation of WHOOP
Source: MDPI journal article supplement (doi:10.3390/s21103571), 2021-05-20
Supplement: s1 [file s1]

Table 3. Agreement between ECG- and WHOOP-derived Ln RMSSD (ms)

| Sleep stage                               | ECG       | Agreement | Filter Strength           |                           |                           |                                 |                                 | WHOOP filter              |
|-------------------------------------------|-----------|-----------|---------------------------|---------------------------|---------------------------|---------------------------------|---------------------------------|---------------------------|
|                                           |           |           | None                      | Low                       | Medium                    | Strong                          | Very Strong                     |                           |
| Time matched;<br>SWS detected by<br>WHOOP | 3.85±0.22 | WHOOP     | 3.95±0.20*                | 3.94±0.20*                | 3.92±0.20*                | 3.90±0.19                       | 3.80±0.16                       | 3.92±0.20*                |
|                                           |           | Bias      | 0.10±0.07 <sup>vs</sup>   | 0.09±0.07 <sup>vs</sup>   | 0.07±0.07 <sup>vs</sup>   | 0.06±0.07 <sup>vs</sup>         | -0.04±0.10 <sup>n,l,m,s,w</sup> | 0.07±0.07 <sup>vs</sup>   |
|                                           |           | Residual  | 0.10±0.05 <sup>vs</sup>   | 0.09±0.05 <sup>vs</sup>   | 0.09±0.05 <sup>vs</sup>   | 0.10±0.04 <sup>vs</sup>         | 0.17±0.04 <sup>n,l,m,s,w</sup>  | 0.09±0.05 <sup>vs</sup>   |
|                                           |           | LOA       | ±0.29                     | ±0.26                     | ±0.25                     | ±0.27                           | ±0.37                           | ±0.25                     |
|                                           |           | %Bias     | 2.81±1.89 <sup>vs</sup>   | 2.53±1.71 <sup>vs</sup>   | 2.12±1.71 <sup>vs</sup>   | 1.66±1.80 <sup>vs</sup>         | -0.77±2.40 <sup>n,l,m,s,w</sup> | 2.11±1.70 <sup>vs</sup>   |
|                                           |           | %Residual | 2.66±1.27 <sup>vs</sup>   | 2.35±1.18 <sup>vs</sup>   | 2.28±1.22 <sup>vs</sup>   | 2.69±1.12 <sup>vs</sup>         | 4.10±1.07 <sup>n,l,m,s,w</sup>  | 2.34±1.18 <sup>vs</sup>   |
|                                           |           | %LOA      | ±7.30                     | ±6.62                     | ±6.61                     | ±6.98                           | ±9.30                           | ±6.59                     |
|                                           |           | ICC       | 0.97 (0.91-0.99)          | 0.97 (0.92-0.99)          | 0.97 (0.92-0.99)          | 0.97 (0.91-0.99)                | 0.93 (0.79-0.98)                | 0.98 (0.93-0.99)          |
| Time matched;<br>SWS detected by<br>PSG   | 3.81±0.30 | WHOOP     | 4.00±0.27*                | 3.99±0.27*                | 3.93±0.28*                | 3.89±0.26*                      | 3.74±0.19                       | 3.93±0.28*                |
|                                           |           | Bias      | 0.18±0.11 <sup>s,vs</sup> | 0.18±0.11 <sup>s,vs</sup> | 0.12±0.06 <sup>s,vs</sup> | 0.07±0.06 <sup>n,l,m,vs,w</sup> | -0.08±0.14 <sup>n,l,m,s,w</sup> | 0.11±0.06 <sup>s,vs</sup> |
|                                           |           | Residual  | 0.14±0.09                 | 0.14±0.09                 | 0.09±0.04 <sup>vs</sup>   | 0.11±0.03 <sup>vs</sup>         | 0.21±0.08 <sup>m,s,w</sup>      | 0.09±0.03 <sup>vs</sup>   |
|                                           |           | LOA       | ±0.44                     | ±0.44                     | ±0.24                     | ±0.25                           | ±0.54                           | ±0.21                     |
|                                           |           | %Bias     | 5.29±3.53 <sup>vs</sup>   | 5.27±3.54 <sup>vs</sup>   | 3.35±1.67 <sup>s,vs</sup> | 2.30±1.69 <sup>m,vs,w</sup>     | -1.18±3.23 <sup>n,l,m,s,w</sup> | 3.25±1.53 <sup>s,vs</sup> |
|                                           |           | %Residual | 4.15±2.78                 | 4.17±2.79                 | 2.64±0.93 <sup>vs</sup>   | 2.88±0.76 <sup>vs</sup>         | 5.11±1.82 <sup>m,s,w</sup>      | 2.54±0.76 <sup>vs</sup>   |
|                                           |           | %LOA      | ±13.68                    | ±13.72                    | ±6.45                     | ±6.54                           | ±12.53                          | ±5.93                     |
|                                           |           | ICC       | 0.96 (0.88-0.99)          | 0.96 (0.88-0.99)          | 0.99 (0.97-1.00)          | 0.99 (0.97-1.00)                | 0.92 (0.76-0.97)                | 0.99 (0.97-1.00)          |

ECG, electrocardiogram; ICC, intraclass correlation coefficient; Ln RMSSD, natural logarithm of the root mean square of successive beat to beat interval differences; LOA, limits of agreement; PSG, polysomnography; SWS, slow wave sleep; \*, significant difference between ECG- and WHOOP-derived Ln RMSSD ( $P<0.05$ ); vs, significantly different from Very Strong filter ( $P<0.05$ ); s, significantly different from Strong filter ( $P<0.05$ ); m, significantly different from Medium filter ( $P<0.05$ ); l, significantly different from Low filter ( $P<0.05$ ); w, significantly different from WHOOP proprietary filter ( $P<0.05$ ). Data are presented as mean  $\pm$  95% confidence interval. Bias is calculated as WHOOP value minus ECG value. %Bias is calculated as bias as a percentage of ECG value.
