# Supplementary material for: Wrist-Based Photoplethysmography Assessment of Heart Rate and Heart Rate Variability: Validation of WHOOP
Source: MDPI journal article supplement (doi:10.3390/s21103571), 2021-05-20
Supplement: s1 [file s1]

Table 2. Agreement between ECG- and WHOOP-derived RMSSD (ms)

| Analysis                                  | ECG         | Agreement | Filter Strength           |                           |                            |                                 |                                  | WHOOP filter               |
|-------------------------------------------|-------------|-----------|---------------------------|---------------------------|----------------------------|---------------------------------|----------------------------------|----------------------------|
|                                           |             |           | None                      | Low                       | Medium                     | Strong                          | Very Strong                      |                            |
| Time matched;<br>SWS detected by<br>WHOOP | 51.27±12.16 | WHOOP     | 56.09±12.22*              | 55.35±12.03*              | 54.3±11.65                 | 53.02±11.14                     | 46.92±7.84                       | 54.47±12.00                |
|                                           |             | Bias      | 4.82±4.24 <sup>vs</sup>   | 4.07±3.65 <sup>vs</sup>   | 3.03±3.43 <sup>vs</sup>    | 1.75±3.53 <sup>vs</sup>         | -4.35±5.81 <sup>n,l,m,s,w</sup>  | 3.20±3.57 <sup>vs</sup>    |
|                                           |             | Residual  | 5.07±3.30 <sup>vs</sup>   | 4.36±2.85 <sup>vs</sup>   | 4.21±2.63 <sup>vs</sup>    | 4.63±2.57 <sup>vs</sup>         | 9.87±2.66 <sup>n,l,m,s,w</sup>   | 4.33±2.75 <sup>vs</sup>    |
|                                           |             | LOA       | ±16.42                    | ±14.14                    | ±13.28                     | ±13.68                          | ±22.52                           | ±13.81                     |
|                                           |             | %Bias     | 11.78±7.81 <sup>vs</sup>  | 10.32±6.71 <sup>vs</sup>  | 8.54±6.64 <sup>vs</sup>    | 6.59±7.04 <sup>vs</sup>         | -2.70±9.04 <sup>n,l,m,s,w</sup>  | 8.54±6.65 <sup>vs</sup>    |
|                                           |             | %Residual | 10.97±5.28                | 9.41±4.55 <sup>vs</sup>   | 8.89±4.73 <sup>vs</sup>    | 10.45±4.42 <sup>vs</sup>        | 15.42±4.07 <sup>l,m,s,w</sup>    | 9.29±4.53 <sup>vs</sup>    |
|                                           |             | %LOA      | ±30.23                    | ±25.98                    | ±25.71                     | ±27.26                          | ±35.03                           | ±25.75                     |
|                                           |             | ICC       | 0.97 (0.91-0.99)          | 0.98 (0.93-0.99)          | 0.98 (0.94-0.99)           | 0.98 (0.93-0.99)                | 0.91 (0.74-0.97)                 | 0.98 (0.93-0.99)           |
| Time matched;<br>SWS detected by<br>PSG   | 53.69±17.37 | WHOOP     | 61.73±16.56*              | 61.59±16.44*              | 58.59±16.62*               | 55.02±14.48                     | 44.85±8.55                       | 58.59±17.00*               |
|                                           |             | Bias      | 8.05±4.83 <sup>s,vs</sup> | 7.91±4.87 <sup>s,vs</sup> | 4.91±3.35 <sup>s,vs</sup>  | 1.33±4.12 <sup>n,l,m,vs,w</sup> | -8.83±10.63 <sup>n,l,m,s,w</sup> | 4.90±2.91 <sup>s,vs</sup>  |
|                                           |             | Residual  | 6.70±3.32 <sup>vs</sup>   | 6.76±3.34 <sup>vs</sup>   | 4.26±2.50 <sup>vs</sup>    | 6.14±2.58 <sup>vs</sup>         | 15.77±6.70 <sup>n,l,m,s,w</sup>  | 3.85±2.09 <sup>vs</sup>    |
|                                           |             | LOA       | ±18.70                    | ±18.85                    | ±12.99                     | ±15.96                          | ±41.19                           | ±11.26                     |
|                                           |             | %Bias     | 23.37±17.93 <sup>vs</sup> | 23.25±17.97 <sup>vs</sup> | 13.25±7.45 <sup>s,vs</sup> | 8.39±6.70 <sup>m,vs,w</sup>     | -4.37±11.44 <sup>n,l,m,s,w</sup> | 12.74±6.53 <sup>s,vs</sup> |
|                                           |             | %Residual | 21.17±14.09               | 21.22±14.12               | 10.41±5.08                 | 11.25±3.18 <sup>vs</sup>        | 18.22±6.3 <sup>s</sup>           | 9.75±4.07                  |
|                                           |             | %LOA      | ±69.43                    | ±69.58                    | ±28.87                     | ±25.94                          | ±44.29                           | ±25.31                     |
|                                           |             | ICC       | 0.98 (0.94-0.99)          | 0.98 (0.94-0.99)          | 0.99 (0.97-1.00)           | 0.98 (0.95-0.99)                | 0.82 (0.47-0.94)                 | 0.99 (0.98-1.00)           |

ECG, electrocardiogram; ICC, intraclass correlation coefficient; LOA, limits of agreement; PSG, polysomnography; RMSSD, root mean square of successive beat to beat interval differences; SWS, slow wave sleep; \*, significant difference between ECG- and WHOOP-derived RMSSD (P<0.05); vs, significantly different from Very Strong filter (P<0.05); s, significantly different from Strong filter (P<0.05); m, significantly different from Medium filter (P<0.05); l, significantly different from Low filter (P<0.05); w, significantly different from WHOOP proprietary filter (P<0.05). Data are presented as mean ± 95% confidence interval. Bias is calculated as WHOOP value minus ECG value. %Bias is calculated as bias as a percentage of ECG value.
