# Supplementary material for: Wrist-Based Photoplethysmography Assessment of Heart Rate and Heart Rate Variability: Validation of WHOOP
Source: MDPI journal article supplement (doi:10.3390/s21103571), 2021-05-20
Supplement: s1 [file s1]

Table 1. Agreement between ECG- and WHOOP-derived Heart Rate (bpm)

| Analysis                                  | ECG        | Agreement | Filter Strength           |                         |                         |                         |                         | WHOOP filter                     |
|-------------------------------------------|------------|-----------|---------------------------|-------------------------|-------------------------|-------------------------|-------------------------|----------------------------------|
|                                           |            |           | None                      | Low                     | Medium                  | Strong                  | Very Strong             |                                  |
| Time matched;<br>SWS detected by<br>WHOOP | 58.06±4.16 | WHOOP     | 58.04±4.14                | 58.03±4.14              | 58.04±4.13              | 58.03±4.13              | 58.00±4.15              | 57.82±4.12*                      |
|                                           |            | Bias      | -0.02±0.18 <sup>w</sup>   | -0.02±0.18 <sup>w</sup> | -0.02±0.19 <sup>w</sup> | -0.02±0.19 <sup>w</sup> | -0.05±0.19 <sup>w</sup> | -0.23±0.21 <sup>n,l,m,s,vs</sup> |
|                                           |            | Residual  | 0.21±0.15 <sup>vs,w</sup> | 0.22±0.14 <sup>w</sup>  | 0.22±0.14               | 0.22±0.15               | 0.24±0.14 <sup>n</sup>  | 0.27±0.15 <sup>n,l</sup>         |
|                                           |            | LOA       | ±0.71                     | ±0.71                   | ±0.72                   | ±0.72                   | ±0.74                   | ±0.81                            |
|                                           |            | %Bias     | -0.03±0.37 <sup>w</sup>   | -0.03±0.37 <sup>w</sup> | -0.02±0.37 <sup>w</sup> | -0.03±0.37 <sup>w</sup> | -0.09±0.39 <sup>w</sup> | -0.39±0.38 <sup>n,l,m,s,vs</sup> |
|                                           |            | %Residual | 0.41±0.30 <sup>vs,w</sup> | 0.42±0.30 <sup>w</sup>  | 0.43±0.30 <sup>w</sup>  | 0.42±0.30 <sup>w</sup>  | 0.47±0.30 <sup>n</sup>  | 0.52±0.30 <sup>n,l,m,s</sup>     |
|                                           |            | %LOA      | ±1.43                     | ±1.43                   | ±1.44                   | ±1.44                   | ±1.52                   | ±1.56                            |
|                                           |            | ICC       | 1.00 (0.99-1.00)          | 1.00 (0.99-1.00)        | 1.00 (0.99-1.00)        | 1.00 (0.99-1.00)        | 1.00 (0.99-1.00)        | 1.00 (0.99-1.00)                 |
| Time matched;<br>SWS detected by<br>PSG   | 58.90±3.98 | WHOOP     | 58.93±4.00                | 58.93±4.00              | 58.93±4.00              | 58.93±3.99              | 58.88±4.02              | 58.74±4.03*                      |
|                                           |            | Bias      | 0.03±0.12 <sup>w</sup>    | 0.03±0.12 <sup>w</sup>  | 0.03±0.12 <sup>w</sup>  | 0.03±0.12 <sup>w</sup>  | -0.03±0.14 <sup>w</sup> | -0.16±0.13 <sup>n,l,m,s,vs</sup> |
|                                           |            | Residual  | 0.14±0.09                 | 0.14±0.09               | 0.14±0.10               | 0.13±0.10               | 0.17±0.10               | 0.17±0.09                        |
|                                           |            | LOA       | ±0.46                     | ±0.45                   | ±0.48                   | ±0.46                   | ±0.53                   | ±0.50                            |
|                                           |            | %Bias     | 0.04±0.22 <sup>w</sup>    | 0.04±0.22 <sup>w</sup>  | 0.04±0.23 <sup>w</sup>  | 0.05±0.22 <sup>w</sup>  | -0.06±0.25 <sup>w</sup> | -0.29±0.24 <sup>n,l,m,s,vs</sup> |
|                                           |            | %Residual | 0.25±0.17                 | 0.25±0.17               | 0.25±0.19               | 0.23±0.18               | 0.32±0.19               | 0.33±0.16                        |
|                                           |            | %LOA      | ±0.84                     | ±0.83                   | ±0.89                   | ±0.85                   | ±0.97                   | ±0.92                            |
|                                           |            | ICC       | 1.00 (0.99-1.00)          | 1.00 (0.99-1.00)        | 1.00 (0.99-1.00)        | 1.00 (0.99-1.00)        | 1.00 (0.99-1.00)        | 1.00 (0.99-1.00)                 |

ECG, electrocardiogram; ICC, intraclass correlation coefficient; LOA, limits of agreement; PSG, polysomnography; SWS, slow wave sleep; \*, significant difference between ECG- and WHOOP-derived HR (P<0.05); vs, significantly different from Very Strong filter (P<0.05); s, significantly different from Strong filter (P<0.05); m, significantly different from Medium filter (P<0.05); l, significantly different from Low filter (P<0.05); w, significantly different from WHOOP proprietary filter (P<0.05). Data are presented as mean ± 95% confidence interval. Bias is calculated as WHOOP value minus ECG value. %Bias is calculated as bias as a percentage of ECG value.
